# Supplementary material for: Stress Hyperglycemia Ratio and Glycemic Variability Predict Mortality in Critical Stroke: A Machine Learning Study
Source: Research Square preprint supplement (doi:10.21203/rs.3.rs-8125196/v1), 2025-12-02
Supplement: Supplementary file 1 [file 4da8ed4592d4a83afac23c04.docx]

**Table A.1: Disease codes included in the study**

| **haemorrhagic stroke** | **ICD9** | **430,431,436,4320,4321,4329** |
| --- | --- | --- |
|  |  |
|  |  |
| **ICD10** | **I6001, I6002, I6010, I6011, I6012, I602, I6020, I6021, I6022** |
|  | **I6031, I6032, I604, I6051, I6052, I606, I607, I608, I609, I610, I611, I612, I613, I614, I615, I616, I618, I619, I6200, I6201, I6202, I6203, I621, I629** |
| **ischaemic stroke** | **ICD9** | **43300，43301，43310，43311，43320，43321，43330，43331，43380，43381，43390，43391，43400，43401，43410，43411，43490，43491** |
| **ICD10** | **I6300, I63011, I63012, I63013, I6302, I63031, I63032, I63039, I6309, I6310, I63111, I63112, I63113, I63119, I6312, I63131, I63132, I63133, I63139, I6319, I6320, I63211, I63212, I63213, I63219, I6322, I63231, I63232, I63233, I63239, I6329, I6330, I63311, I63312, I63313, I63319, I63321, I63322, I63331, I63332, I63333, I63341, I63342, I63343, I63349, I6339, I6340, I63411, I63412, I63413, I63419, I63421, I63422, I63423, I63429, I63431, I63432, I63433, I63439, I63441, I63442, I63443, I63449, I6349, I6350, I63511, I63512, I63513, I63521, I63522, I63523, I63529, I63531, I63532, I63533, I63539, I63541, I63542, I63543, I63549, I6359, I636, I638, I6381, I6389, I639, I6501, I6502, I6503, I6509, I651, I6521, I6522, I6523, I6529, I658, I659, I6601, I6602, I6609, I6611, I6612, I6613, I6621, I6622, I6623, I663, I668, I669** |
|  |  |  |
| **Stroke not specified as haemorrhage or infarction** | **ICD9** | **436，4370，4371，4372，4373，4374，4375，4376，4377，4378，4379** |

**Table A.2: Univariate Cox regression results**

| **Characteristics** | **Number (%)** | **Hazard Ratio (HR)** | **95% CI Lower** | **95% CI Upper** | **P** |
| --- | --- | --- | --- | --- | --- |
| Age | - | 1.036 | 1.028 | 1.044 | 0 |
| Male | 1181(51.80) | 0.825 | 0.678 | 1.004 | 0.055 |
| MI | 363(15.90) | 1.262 | 0.984 | 1.618 | 0.066 |
| CHF | 543(23.80) | 1.530 | 1.240 | 1.889 | 0 |
| CVD | 2170(95.1) | 2.099 | 1.120 | 3.932 | 0.021 |
| COPD | 326(14.30) | 0.841 | 0.625 | 1.131 | 0.251 |
| RD | 399(17.50) | 1.529 | 1.215 | 1.923 | 0 |
| HTN | 1279(56.10) | 0.809 | 0.665 | 0.984 | 0.033 |
| Afib | 613(26.90) | 1.424 | 1.157 | 1.751 | 0 |
| Diabetes | 773(33.90) | 1.230 | 1.006 | 1.505 | 0.043 |
| diabetes |  | | | | |
| NGR | 876(38.40) |  | | | |
| Pre_DM | 589(25.80) | 0.985 | 0.758 | 1.280 | 0.909 |
| DM | 816(35.80) | 1.302 | 1.040 | 1.629 | 0.021 |
| Antihyperglycemic drug, | 103(4.50) | 0.145 | 0.047 | 0.452 | 0 |
| Mechanical ventilation, | 735(32.20) | 3.758 | 3.076 | 4.591 | 0 |
| RI | 1860(81.50) | 1.505 | 1.130 | 2.004 | 0.005 |
| HR | - | 1.019 | 1.012 | 1.025 | 0 |
| RR | - | 1.119 | 1.088 | 1.151 | 0 |
| SpO2 | - | 1.278 | 1.204 | 1.357 | 0 |
| Temperature | - | 1.756 | 1.391 | 2.218 | 0 |
| SBP | - | 0.992 | 0.986 | 0.998 | 0.008 |
| DBP | - | 0.966 | 0.959 | 0.974 | 0 |
| MBP | - | 0.972 | 0.964 | 0.980 | 0 |
| Hb | - | 0.848 | 0.811 | 0.887 | 0 |
| Plt | - | 0.999 | 0.998 | 1.000 | 0.241 |
| WBC | - | 1.016 | 1.011 | 1.020 | 0 |
| BUN | - | 1.016 | 1.012 | 1.020 | 0 |

**Table A.2 (continued)**

| **Characteristics** | **Number (%)** | **Hazard Ratio (HR)** | **95% CI Lower** | **95% CI Upper** | **p** |
| --- | --- | --- | --- | --- | --- |
| Creatinine | - | 1.126 | 1.071 | 1.183 | 0 |
| Glucose | - | 1.010 | 1.009 | 1.012 | 0 |
| PT | - | 1.019 | 1.011 | 1.027 | 0 |
| PTT | - | 0.998 | 0.994 | 1.002 | 0.420 |
| HbA1c | - | 1.028 | 0.968 | 1.092 | 0.370 |
| SHR | - | 1.834 | 1.568 | 2.145 | 0 |
| SHR tertiles |  | | | | |
| Low | 703(30.86) |  | | | |
| Mid | 830(36.39) | 1.552 | 1.181 | 2.040 | 0.002 |
| High | 747(32.75) | 2.324 | 1.785 | 3.027 | 0 |
| GV | - | 1.016 | 1.010 | 1.022 | 0 |
| GV tertiles |  | | | | |
| Low | 969(42.48) |  | | | |
| Mid | 740(32.44) | 0.984 | 0.768 | 1.261 | 0.900 |
| High | 572(25.08) | 1.829 | 1.453 | 2.301 | 0 |
| Group |  | | | | |
| 1 | 1217(53.33) |  | | | |
| 2 | 334(14.63) | 1.737 | 1.309 | 2.304 | 0 |
| 3 | 483(21.17) | 1.731 | 1.345 | 2.226 | 0 |
| 4 | 247(10.82) | 2.765 | 2.103 | 3.635 | 0 |
| GCS | - | 0.907 | 0.878 | 0.937 | 0 |
| APSIII | - | 1.035 | 1.030 | 1.040 | 0 |
| OASIS | - | 1.087 | 1.075 | 1.100 | 0 |
| SOFA | - | 1.195 | 1.158 | 1.234 | 0 |
| SAPSII | - | 1.062 | 1.055 | 1.070 | 0 |

**Abbreviations:** APSIII, Acute Physiology Score; BUN, Blood Urea Nitrogen; CHF, Congestive Heart Failure; COPD, Chronic Pulmonary Disease; CVD, Cerebrovascular Disease; DBP, Diastolic Blood Pressure; DM, Diabetes Mellitus; GCS, Glasgow Coma Scale; GV, Glycemic Variability; Hb, Hemoglobin Concentration; HbA1c, Glycated Hemoglobin; HR, Heart Rate; HTN, Hypertension; MBP, Mean Blood Pressure; MI, Myocardial Infarction; NGR, Normal Glucose Regulation; OASIS, Oxford Acute Severity of Illness Score; Plt, platelet; Pre_DM, Pre-Diabetes Mellitus; PT, Prothrombin Time; PTT, Partial Thromboplastin Time; RD, Renal Disease; RI, Insulin; RR, Respiratory Rate; SAPSII, Simplified Acute Physiology Score; SBP, Systolic Blood Pressure; SHR, Stress Hyperglycemia Ratio; SOFA, Sequential Organ Failure Assessment; WBC, White Blood Cell

Group 1: Low SHR and Low GV (SHR < 1.15 and GV < 24.46); Group 2: Low SHR and High GV (SHR < 1.15 and GV > 24.46); Group 3: High SHR and Low GV (SHR > 1.15 and GV < 24.46); Group 4: High SHR and High GV (SHR > 1.15 and GV > 24.46)

**Table A.3: Variance inflation factor between variables.**

| **Variable** | **unadjusted** | |  | **adjusted** | |  |
| --- | --- | --- | --- | --- | --- | --- |
| **Tolerances** | **VIF** |  | **Tolerances** | **VIF** |  |
| Gender | .819 | 1.221 |  | .819 | 1.221 |  |
| Age | .428 | 2.338 |  | .430 | 2.326 |  |
| GCS | .468 | 2.139 |  | .468 | 2.139 |  |
| APSIII | .257 | 3.886 |  | .260 | 3.844 |  |
| OASIS | .356 | 2.806 |  | .356 | 2.806 |  |
| SOFA | .372 | 2.689 |  | .372 | 2.688 |  |
| SAPSII | .217 | 4.617 |  | .220 | 4.551 |  |
| HR | .639 | 1.566 |  | .639 | 1.566 |  |
| SBP | .198 | 5.050 |  | .555 | 1.802 |  |
| DBP | .069 | 14.512 |  | .452 | 2.215 |  |
| MBP | .046 | 21.888 |  | - | - |  |
| RR | .768 | 1.302 |  | .771 | 1.297 |  |
| T | .798 | 1.253 |  | .798 | 1.253 |  |
| Spo2 | .712 | 1.405 |  | .712 | 1.404 |  |
| HB | .670 | 1.492 |  | .671 | 1.490 |  |
| Plt | .859 | 1.164 |  | .860 | 1.163 |  |
| WBC | .836 | 1.196 |  | .836 | 1.196 |  |
| BUN | .444 | 2.253 |  | .445 | 2.248 |  |
| Creatinine | .502 | 1.994 |  | .502 | 1.994 |  |
| Glucose | .319 | 3.131 |  | .319 | 3.131 |  |
| PT | .855 | 1.169 |  | .855 | 1.169 |  |
| PTT | .871 | 1.148 |  | .879 | 1.137 |  |
| GV | .621 | 1.611 |  | .621 | 1.611 |  |
| SHR | .622 | 1.607 |  | .624 | 1.603 |  |
| HbA1c | .380 | 2.632 |  | .381 | 2.626 |  |
| MI | .819 | 1.222 |  | .821 | 1.218 |  |
| CHF | .691 | 1.447 |  | .692 | 1.445 |  |
| CVD | .850 | 1.177 |  | .850 | 1.177 |  |
| COPD | .925 | 1.081 |  | .925 | 1.081 |  |
| Diabetes | .504 | 1.985 |  | .504 | 1.985 |  |
| RD | .533 | 1.877 |  | .533 | 1.876 |  |
| HTN | .630 | 1.588 |  | .630 | 1.586 |  |
| Afib | .792 | 1.263 |  | .794 | 1.259 |  |
| InvasiveVent | .516 | 1.936 |  | .520 | 1.925 |  |
| Insulin | .856 | 1.168 |  | .856 | 1.168 |  |
| antihyperglycemic drug | .868 | 1.152 |  | .868 | 1.152 |  |

**Abbreviations:** APSIII, Acute Physiology Score; BUN, Blood Urea Nitrogen; CHF, Congestive Heart Failure; COPD, Chronic Pulmonary Disease; CVD, Cerebrovascular Disease; DBP, Diastolic Blood Pressure; DM, Diabetes Mellitus; GCS, Glasgow Coma Scale; GV, Glycemic Variability; Hb, Hemoglobin Concentration; HbA1c, Glycated Hemoglobin; HR, Heart Rate; HTN, Hypertension; MBP, Mean Blood Pressure; MI, Myocardial Infarction; NGR, Normal Glucose Regulation; OASIS, Oxford Acute Severity of Illness Score; Plt, platelet; Pre_DM, Pre-Diabetes Mellitus; PT, Prothrombin Time; PTT, Partial Thromboplastin Time; RD, Renal Disease; RI, Insulin; RR, Respiratory Rate; SAPSII, Simplified Acute Physiology Score; SBP, Systolic Blood Pressure; SHR, Stress Hyperglycemia Ratio; SOFA, Sequential Organ Failure Assessment; WBC, White Blood Cell

**Table A.4: The association of the SHR and GV with 28-day and 90-day mortality**

| **Variables** | **Model 1** | | |  | **Model 2** |  |  | **Model 3** | |
| --- | --- | --- | --- | --- | --- | --- | --- | --- | --- |
| **HR (95%CI)** | | **P** |  | **HR (95%CI)** | **P** |  | **HR (95%CI)** | **P** |
| **28-day mortality** |  | |  |  |  |  |  |  |  |
| **Overall** |  | |  |  |  |  |  |  |  |
| SHR |  | |  |  |  |  |  |  |  |
| T1 | 1.00 (Reference) | |  |  | 1.00 (Reference) |  |  | 1.00 (Reference) |  |
| T2 | 1.55(1.18~2.04) | | 0.002 |  | 1.54(1.17~2.02) | 0.002 |  | 1.38(1.04~1.82) | 0.024 |
| T3 | 2.32(1.79~3.03) | | <0.001 |  | 2.13(1.63~2.78) | <0.001 |  | 1.53(1.16~2.01) | 0.002 |
| P for trend | 1.52(1.34~1.73) | | <0.001 |  | 1.45(1.27~1.65) | <0.001 |  | 1.22(1.07~1.39) | 0.003 |
| GV |  | |  |  |  |  |  |  |  |
| T1 | 1.00 (Reference) | |  |  | 1.00 (Reference) |  |  | 1.00 (Reference) |  |
| T2 | 0.98(0.77~1.26) | | 0.9 |  | 0.86(0.67~1.10) | 0.238 |  | 0.62(0.48~0.81) | <0.001 |
| T3 | 1.83(1.45~2.30) | | <0.001 |  | 1.60(1.27~2.03) | <0.001 |  | 0.92(0.70~1.22) | 0.579 |
| P for trend | 1.35(1.20~1.53) | | <0.001 |  | 1.18(1.04~1.33) | 0.011 |  | 0.95(0.82~1.10) | 0.520 |
| **Patients with NGR** | | |  |  |  |  |  |  |  |
| SHR |  | |  |  |  |  |  |  |  |
| T1 | 1.00 (Reference) | |  |  | 1.00 (Reference) |  |  | 1.00 (Reference) |  |
| T2 | 1.83(1.06~3.15) | | 0.03 |  | 1.70(0.99~2.93) | 0.056 |  | 1.41(0.81~2.45) | 0.225 |
| T3 | 3.09(1.82~5.26) | | <0.001 |  | 2.70(1.58~4.62) | <0.001 |  | 1.90(1.10~3.31) | 0.022 |
| P for trend | 1.74(1.37~2.21) | | <0.001 |  | 1.63(1.28~2.07) | <0.001 |  | 1.37(1.07~1.76) | 0.014 |
| GV |  | |  |  |  |  |  |  |  |
| T1 | 1.00 (Reference) | |  |  | 1.00 (Reference) |  |  | 1.00 (Reference) |  |
| T2 | 0.88(0.60~1.30) | | 0.516 |  | 0.61(0.41~0.91) | 0.015 |  | 0.55(0.36~0.84) | 0.005 |
| T3 | 2.41(1.58~3.68) | | <0.001 |  | 1.70(1.09~2.65) | 0.018 |  | 1.39(0.86~2.24) | 0.175 |
| P for trend | 1.41(1.13~1.78) | | 0.003 |  | 1.15(0.89~1.47) | 0.282 |  | 1.02(0.78~1.32) | 0.900 |
| **Patients with Pre-DM** | | |  |  |  |  |  |  |  |
| SHR |  | |  |  |  |  |  |  |  |
| T1 | 1.00 (Reference) | |  |  | 1.00 (Reference) |  |  | 1.00 (Reference) |  |
| T2 | 2.38(1.35~ 4.20) | | 0.003 |  | 2.25(1.27~3.96) | 0.005 |  | 1.71(0.96~3.04) | 0.070 |
| T3 | 4.15(2.33~7.41) | | <0.001 |  | 3.68(2.03~6.66) | <0.001 |  | 3.09(1.68~5.70) | <0.001 |
| P for trend | 1.99(1.52~2.61) | | <0.001 |  | 1.88(1.42~2.49) | <0.001 |  | 1.77(1.30~2.39) | <0.001 |
| GV |  | |  |  |  |  |  |  |  |
| T1 | 1.00 (Reference) | |  |  | 1.00 (Reference) |  |  | 1.00 (Reference) |  |
| T2 | 1.11(0.69~1.79) | | 0.679 |  | 0.91(0.56~1.48) | 0.690 |  | 0.77(0.47~1.26) | 0.297 |
| T3 | 2.20(1.33~3.64) | | 0.002 |  | 1.74(1.03~2.93) | 0.038 |  | 1.25(0.71~2.22) | 0.435 |
| P for trend | 1.45(1.11~1.89) | | 0.006 |  | 1.28(0.97~1.69) | 0.078 |  | 1.08(0.80~1.45) | 0.624 |
| **Patients with DM** | |  |  |  |  |  |  |  |  |
| SHR |  | |  |  |  |  |  |  |  |
| T1 | 1.00 (Reference) | |  |  | 1.00 (Reference) |  |  | 1.00 (Reference) |  |
| T2 | 1.28(0.86~1.92) | | 0.226 |  | 1.32(0.88~1.98) | 0.177 |  | 1.27(0.84~1.92) | 0.251 |
| T3 | 1.49(1.03~2.16) | | 0.033 |  | 1.43(0.99~2.08) | 0.057 |  | 1.07(0.73~1.58) | 0.721 |
| P for trend | 1.22(1.02~1.46) | | 0.033 |  | 1.19(0.99~1.43) | 0.061 |  | 1.03(0.85~1.24) | 0.782 |

**Table A.4 (continued)**

| **Variables** | **Model 1** | |  | **Model 2** |  |  | **Model 3** | |
| --- | --- | --- | --- | --- | --- | --- | --- | --- |
| **HR (95%CI)** | **P** |  | **HR (95%CI)** | **P** |  | **HR (95%CI)** | **P** |
| GV |  |  |  |  |  |  |  |  |
| T1 | 1.00 (Reference) |  |  | 1.00 (Reference) |  |  | 1.00 (Reference) |  |
| T2 | 0.95(0.61~1.49) | 0.823 |  | 0.94(0.60~1.47) | 0.778 |  | 0.62(0.38~1.00) | 0.049 |
| T3 | 1.38(0.94~2.02) | 0.106 |  | 1.38(0.93~2.04) | 0.109 |  | 0.79(0.51~1.24) | 0.308 |
| P for trend | 1.21(0.99~1.46) | 0.057 |  | 1.21(0.99~1.47) | 0.058 |  | 0.94(0.75~1.17) | 0.569 |
| **90-day mortality** |  |  |  |  |  |  |  |  |
| **Overall** |  |  |  |  |  |  |  |  |
| SHR |  |  |  |  |  |  |  |  |
| T1 | 1.00 (Reference) |  |  | 1.00 (Reference) |  |  | 1.00 (Reference) |  |
| T2 | 1.26(1.00~1.58) | 0.046 |  | 1.24(0.99~1.56) | 0.062 |  | 1.15(0.91~1.45) | 0.249 |
| T3 | 1.84(1.48~2.30) | <0.001 |  | 1.66(1.33~2.07) | <0.001 |  | 1.24(0.99~1.56) | 0.066 |
| P for trend | 1.37(1.23~1.53) | <0.001 |  | 1.29(1.16~1.44) | <0.001 |  | 1.11(0.99~1.24) | 0.068 |
| GV |  |  |  |  |  |  |  |  |
| T1 | 1.00 (Reference) |  |  | 1.00 (Reference) |  |  | 1.00 (Reference) |  |
| T2 | 1.18(0.95~1.47) | 0.136 |  | 1.03(0.83~1.28) | 0.794 |  | 0.77(0.61~0.96) | 0.022 |
| T3 | 2.10(1.71~2.57) | <0.001 |  | 1.83(1.48~2.25) | <0.001 |  | 1.14(0.89~1.46) | 0.295 |
| P for trend | 1.45(1.31~1.62) | <0.001 |  | 1.36(1.22~1.52) | <0.001 |  | 1.07(0.94~1.21) | 0.318 |
| **Patients with NGR** | |  |  |  |  |  |  |  |
| SHR |  |  |  |  |  |  |  |  |
| T1 | 1.00 (Reference) |  |  | 1.00 (Reference) |  |  | 1.00 (Reference) |  |
| T2 | 1.38(0.89~2.14) | 0.151 |  | 1.29(0.83~2.00) | 0.260 |  | 1.14(0.73~1.79) | 0.564 |
| T3 | 2.32(1.51~3.56) | <0.001 |  | 2.01(1.31~3.11) | 0.002 |  | 1.57(1.00~2.45) | 0.050 |
| P for trend | 1.56(1.27~1.92) | <0.001 |  | 1.45(1.18~1.79) | <0.001 |  | 1.28(1.03~1.59) | 0.026 |
| GV |  |  |  |  |  |  |  |  |
| T1 | 1.00 (Reference) |  |  | 1.00 (Reference) |  |  | 1.00 (Reference) |  |
| T2 | 1.10(0.79~1.54) | 0.569 |  | 0.93(0.66~1.31) | 0.680 |  | 0.70(0.49~1.00) | 0.052 |
| T3 | 2.58(1.75~3.78) | <0.001 |  | 2.16(1.45~3.22) | <0.001 |  | 1.32(0.85~2.05) | 0.216 |
| P for trend | 1.51(1.24~1.85) | <0.001 |  | 1.36(1.10~1.68) | 0.004 |  | 1.05(0.84~1.33) | 0.658 |
| **Patients with Pre-DM** | |  |  |  |  |  |  |  |
| SHR |  |  |  |  |  |  |  |  |
| T1 | 1.00 (Reference) |  |  | 1.00 (Reference) |  |  | 1.00 (Reference) |  |
| T2 | 1.71(1.10~2.66) | 0.018 |  | 1.62(1.04~2.53) | 0.033 |  | 1.26(0.80~1.99) | 0.325 |
| T3 | 2.68(1.68~4.29) | <0.001 |  | 2.14(1.32~3.48) | 0.002 |  | 1.79(1.08~2.96) | 0.024 |
| P for trend | 1.64(1.30~2.06) | <0.001 |  | 1.46(1.15~1.85) | 0.002 |  | 1.34(1.04~1.73) | 0.025 |
| GV |  |  |  |  |  |  |  |  |
| T1 | 1.00 (Reference) |  |  | 1.00 (Reference) |  |  | 1.00 (Reference) |  |
| T2 | 1.26(0.84~1.91) | 0.266 |  | 0.97(0.64~1.48) | 0.883 |  | 0.78(0.51~1.20) | 0.259 |
| T3 | 2.38(1.53~3.70) | <0.001 |  | 1.71(1.08~2.71) | 0.021 |  | 1.23(0.75~2.02) | 0.419 |
| P for trend | 1.52(1.21~1.91) | <0.001 |  | 1.28(1.01~1.63) | 0.043 |  | 1.08(0.83~1.40) | 0.583 |

**Table A.4 (continued)**

| **Variables** | **Model 1** | | | |  | | **Model 2** | |  | |  | | **Model 3** | | | |
| --- | --- | --- | --- | --- | --- | --- | --- | --- | --- | --- | --- | --- | --- | --- | --- | --- |
| **HR (95%CI)** | | **P** | |  | | **HR (95%CI)** | | **P** | |  | | **HR (95%CI)** | | **P** | |
| **Patients with DM** | |  |  |  | |  | |  | |  | |  | |  | |
| SHR |  | |  |  | |  | |  | |  | |  | |  | |
| T1 | 1.00 (Reference) | |  |  | | 1.00 (Reference) | |  | |  | | 1.00 (Reference) | |  | |
| T2 | 1.14(0.80~1.61) | | 0.469 |  | | 1.15(0.81~1.64) | | 0.423 | |  | | 1.15(0.81~1.64) | | 0.427 | |
| T3 | 1.32(0.96~1.81) | | 0.084 |  | | 1.26(0.92~1.73) | | 0.153 | |  | | 0.97(0.69~1.35) | | 0.839 | |
| P for trend | 1.15(0.98~1.35) | | 0.082 |  | | 1.12(0.96~1.31) | | 0.155 | |  | | 0.98(0.83~1.15) | | 0.799 | |
| GV |  | |  |  | |  | |  | |  | |  | |  | |
| T1 | 1.00 (Reference) | |  |  | | 1.00 (Reference) | |  | |  | | 1.00 (Reference) | |  | |
| T2 | 1.14(0.76~1.71) | | 0.524 |  | | 1.14(0.76~1.72) | | 0.520 | |  | | 0.78(0.51~1.20) | | 0.263 | |
| T3 | 1.70(1.19~2.42) | | 0.003 |  | | 1.72(1.20~2.46) | | 0.003 | |  | | 1.02(0.69~1.52) | | 0.918 | |
| P for trend | 1.33(1.12~1.58) | | 0.001 |  | | 1.34(1.13~1.60) | | 0.001 | |  | | 1.05(0.86~1.29) | | 0.604 | |

Model1：unadjusted

Model2：adjusted for age, gender, HR, RR, SBP

Model3：adjusted for Model 2 plus MI, CHF, RD, HTN, Afib, DM, Hb ,BUN, Creatinine, PT, Mechanical ventilation, RI, SOFA, APSIII

**Table A.5: Results of the proportional hazards test (Cox model) in the NGR population**

| **Variable Name** | **P** |
| --- | --- |
| SHR | 0.0093 |
| GV | 0.7019 |
| age | 0.0002 |
| gender | 0.8692 |
| HR | 0.4370 |
| RR | 0.2528 |
| SDP | 0.3542 |
| HB | 0.0201 |
| BUN | 0.8843 |
| Creatinine | 0.7582 |
| pt | 0.8206 |
| CHF | 0.0616 |
| MI | 0.1196 |
| RD | 0.0680 |
| HTN | 0.1429 |
| afib | 0.0102 |
| InvasiveVent | 0.0010 |
| Insulin | 0.8074 |
| sofa | 0.8608 |
| apsiii | 0.5181 |
| Group | 0.0185 |
| GLOBAL | 0.0037 |

**Table A.6: Results of the proportional hazards test (Cox model) in the Pre_DM population**

| **Variable Name** | **P** |
| --- | --- |
| SHR | 0.542 |
| GV | 0.896 |
| Age | 0.528 |
| Gender | 0.080 |
| HR | 0.486 |
| RR | 0.881 |
| SDP | 0.432 |
| HB | 0.959 |
| BUN | 0.660 |
| Creatinine | 0.944 |
| pt | 0.069 |
| CHF | 0.813 |
| MI | 0.922 |

**Table A.6 (continued)**

| RD | 0.630 |
| --- | --- |
| HTN | 0.396 |
| afib | 0.925 |
| InvasiveVent | 0.318 |
| Insulin | 0.803 |
| sofa | 0.334 |
| apsiii | 0.975 |
| Group | 0.525 |
| GLOBAL | 0.585 |

**Table A.7: Results of the proportional hazards test (Cox model) in the DM population**

| **Variable Name** | **P** |
| --- | --- |
| SHR | 0.599 |
| GV | 0.162 |
| age | 0.513 |
| gender | 0.265 |
| HR | 0.519 |
| RR | 0.812 |
| SDP | 0.452 |
| HB | 0.074 |
| BUN | 0.432 |
| Creatinine | 0.572 |
| PT | 0.836 |
| CHF | 0.133 |
| MI | 0.040 |
| RD | 0.230 |
| Afib | 0.613 |
| HTN | 0.162 |
| Afib | 0.613 |
| Diabetes | 0.018 |
| InvasiveVent | 0.348 |
| Insulin | 0.859 |
| sofa | 0.765 |
| apsiii | 0.932 |
| Group | 0.586 |
| GLOBAL | 0.420 |

**Table A.8: Discrimination of each predictive model for outcomes**

| **Models** | **AUC (95% CI)** | **Sensitivity** | **Specificity** | **P** |
| --- | --- | --- | --- | --- |
| **28-day mortality** |  |  |  |  |
| **NGR** |  |  |  |  |
| SHR+GV | 0.579(0.526-0.632) | 0.206 | 0.932 | 1.00 (Reference) |
| SHR | 0.640(0.588-0.691) | 0.454 | 0.765 | 0.094 |
| GV | 0.575(0.522-0.628) | 0.213 | 0.924 | <0.001 |
| SOFA | 0.677(0.628-0.727) | 0.553 | 0.710 | 0.002 |
| APSIII | 0.772(0.728-0.816) | 0.688 | 0.750 | <0.001 |
| **Pre-DM** |  |  |  |  |
| SHR+GV | 0.580(0.515-0.644) | 0.398 | 0.758 | 1.00 (Reference) |
| SHR | 0.662(0.603-0.722) | 0.806 | 0.460 | 0.070 |
| GV | 0.576(0.510-0.642) | 0.441 | 0.716 | 0.000 |
| SOFA | 0.645(0.584-0.705) | 0.667 | 0.554 | 0.128 |
| APSIII | 0.652(0.592-0.712) | 0.645 | 0.631 | 0.055 |
| **DM** |  |  |  |  |
| SHR+GV | 0.560(0.510-0.610) | 0.359 | 0.781 | 1.00 (Reference) |
| SHR | 0.574(0.524-0.623) | 0.653 | 0.471 | 0.686 |
| GV | 0.557(0.507-0.607) | 0.347 | 0.783 | 0.000 |
| SOFA | 0.644(0.596-0.692) | 0.623 | 0.624 | 0.010 |
| APSIII | 0.640(0.592, 0.688) | 0.491 | 0.718 | 0.010 |
| **90-day mortality** |  |  |  |  |
| **NGR** |  |  |  |  |
| SHR+GV | 0.601(0.554-0.648) | 0.494 | 0.659 | 1.00 (Reference) |
| SHR | 0.622(0.574-0.670) | 0.456 | 0.747 | 0.519 |
| GV | 0.597(0.550-0.645) | 0.494 | 0.664 | 0.001 |
| SOFA | 0.672(0.629-0.716) | 0.528 | 0.718 | 0.013 |
| APSIII | 0.755(0.714-0.795) | 0.639 | 0.761 | <0.001 |
| **Pre-DM** |  |  |  |  |
| SHR+GV | 0.594(0.528-0.647) | 0.444 | 0.729 | 1.00 (Reference) |
| SHR | 0.617(0.562-0.673) | 0.742 | 0.460 | 0.555 |
| GV | 0.591(0.533-0.649) | 0.452 | 0.729 | 0.022 |
| SOFA | 0.654(0.600-0.707) | 0.677 | 0.572 | 0.104 |
| APSIII | 0.666(0.612-0.720) | 0.581 | 0.727 | 0.032 |
| **DM** |  |  |  |  |
| SHR+GV | 0.584(0.540-0.628) | 0.534 | 0.625 | 1.00 (Reference) |
| SHR | 0.557(0.512-0.602) | 0.639 | 0.459 | 0.372 |
| GV | 0.581(0.537-0.625) | 0.553 | 0.603 | 0.002 |
| SOFA | 0.657(0.614-0.700) | 0.612 | 0.642 | 0.010 |
| APSIII | 0.657(0.614-0.700) | 0.498 | 0.739 | 0.007 |

**Abbreviations:** SHR, Stress hyperglycemia ratio; GV, Glycemic variability; APSIII, Acute Physiology Score; SOFA, Sequential Organ Failure Assessment

**Table A.9: The association of the combination of SHR and GV with all-cause mortality after excluding individuals with hypoglycemic episodes**

| **Variables** | **Model 1** | |  | **Model 2** | |  | | **Model 3** | |
| --- | --- | --- | --- | --- | --- | --- | --- | --- | --- |
| **HR (95%CI)** | **P** |  | **HR (95%CI)** | **P** | |  | **HR (95%CI)** | **P** |
| **28-day mortality** |  |  |  |  |  | |  |  |  |
| **Overall** |  |  |  |  |  | |  |  |  |
| Group 1 | 1.00 (Reference) |  |  | 1.00 (Reference) |  | |  | 1.00 (Reference) |  |
| Group 2 | 1.59(1.17~2.17) | 0.003 |  | 1.49(1.09~2.03) | 0.012 | |  | 1.14(0.82~1.59) | 0.424 |
| Group 3 | 1.73(1.34~2.23) | <0.001 |  | 1.56(1.21~2.02) | <0.001 | |  | 1.26(0.97~1.63) | 0.089 |
| Group 4 | 2.72(2.04~3.62) | <0.001 |  | 2.49(1.86~3.34) | <0.001 | |  | 1.51(1.08~2.10) | 0.016 |
| P for trend | 1.37(1.25~1.49) | <0.001 |  | 1.32(1.20~1.44) | <0.001 | |  | 1.14(1.03~1.25) | 0.010 |
| **Patients with NGR** |  |  |  |  |  | |  |  |  |
| Group 1 | 1.00 (Reference) |  |  | 1.00 (Reference) |  | |  | 1.00 (Reference) |  |
| Group 2 | 1.60(0.79~3.23) | 0.187 |  | 1.54(0.76~3.12) | 0.229 | |  | 1.12(0.51~2.43) | 0.782 |
| Group 3 | 1.73(1.18~2.53) | 0.005 |  | 1.56(1.06~2.29) | 0.024 | |  | 1.25(0.83~1.87) | 0.284 |
| Group 4 | 4.91(2.86~8.42) | <0.001 |  | 4.32(2.45~7.62) | <0.001 | |  | 2.67(1.44~4.98) | 0.002 |
| P for trend | 1.48(1.26~1.73) | <0.001 |  | 1.40(1.19~1.65) | <0.001 | |  | 1.23(1.04~1.45) | 0.018 |
| **Patients with Pre-DM** | |  |  |  |  | |  |  |  |
| Group 1 | 1.00 (Reference) |  |  | 1.00 (Reference) |  | |  | 1.00 (Reference) |  |
| Group 2 | 2.24(1.18~4.26) | 0.014 |  | 2.01(1.05~3.83) | 0.035 | |  | 1.53(0.77~3.03) | 0.221 |
| Group 3 | 2.88(1.76~4.70) | <0.001 |  | 2.65(1.60~4.41) | <0.001 | |  | 2.57(1.52~4.35) | <0.001 |
| Group 4 | 3.00(1.41~6.40) | 0.004 |  | 2.58(1.19~5.59) | 0.016 | |  | 2.37(1.04~5.41) | 0.040 |
| P for trend | 1.56(1.29~1.88) | <0.001 |  | 1.48(1.22~1.80) | <0.001 | |  | 1.46(1.18~1.80) | <0.001 |
| **Patients with DM** |  |  |  |  |  | |  |  |  |
| Group 1 | 1.00 (Reference) |  |  | 1.00 (Reference) |  | |  | 1.00 (Reference) |  |
| Group 2 | 1.13(0.73~1.74) | 0.593 |  | 1.10(0.71~1.70) | 0.669 | |  | 0.88(0.55~1.41) | 0.595 |
| Group 3 | 1.12(0.69~1.83) | 0.637 |  | 1.01(0.62~1.64) | 0.974 | |  | 0.75(0.45~1.26) | 0.275 |
| Group 4 | 1.74(1.16~2.61) | 0.008 |  | 1.70(1.13~2.57) | 0.011 | |  | 1.02(0.64~1.62) | 0.942 |
| P for trend | 1.19(1.04~1.36) | 0.013 |  | 1.17(1.02~1.34) | 0.026 | |  | 0.99(0.85~1.15) | 0.904 |
| **90-day mortality** |  |  |  |  |  | |  |  |  |
| **Overall** |  |  |  |  |  | |  |  |  |
| Group 1 | 1.00 (Reference) |  |  | 1.00 (Reference) |  | |  | 1.00 (Reference) |  |
| Group 2 | 1.77(1.37~2.29) | <0.001 |  | 1.64(1.27~2.13) | <0.001 | |  | 1.29(0.98~1.70) | 0.075 |
| Group 3 | 1.57(1.25~1.97) | <0.001 |  | 1.40(1.12~1.76) | 0.004 | |  | 1.15(0.91~1.46) | 0.227 |
| Group 4 | 2.57(1.99~3.32) | <0.001 |  | 2.31(1.78~2.99) | <0.001 | |  | 1.50(1.12~2.01) | 0.007 |
| P for trend | 1.32(1.23~1.43) | <0.001 |  | 1.27(1.17~1.37) | <0.001 | |  | 1.11(1.02~1.21) | 0.019 |
| **Patients with NGR** |  |  |  |  |  | |  |  |  |
| Group 1 | 1.00 (Reference) |  |  | 1.00 (Reference) |  | |  | 1.00 (Reference) |  |
| Group 2 | 1.81(1.00~3.25) | 0.049 |  | 1.73(0.96~3.13) | 0.069 | |  | 1.27(0.66~2.44) | 0.467 |
| Group 3 | 1.73(1.24~2.42) | 0.001 |  | 1.55(1.11~2.18) | 0.011 | |  | 1.31(0.92~1.87) | 0.129 |
| Group 4 | 4.40(2.66~7.27) | <0.001 |  | 3.94(2.33~6.66) | <0.001 | |  | 2.44(1.38~4.33) | 0.002 |
| P for trend | 1.44(1.25~1.66) | <0.001 |  | 1.37(1.19~1.58) | <0.001 | |  | 1.22(1.05~1.42) | 0.008 |
| **Patients with Pre-DM** | |  |  |  |  | |  |  |  |
| Group 1 | 1.00 (Reference) |  |  | 1.00 (Reference) |  | |  | 1.00 (Reference) |  |

**Table A.9 (continued)**

| **Variables** | **Model 1** | |  | **Model 2** | |  | | **Model 3** | |
| --- | --- | --- | --- | --- | --- | --- | --- | --- | --- |
| **HR (95%CI)** | **P** |  | **HR (95%CI)** | **P** | |  | **HR (95%CI)** | **P** |
| Group 2 | 2.16(1.26~3.69) | 0.005 |  | 1.82(1.06~3.13) | 0.029 | |  | 1.48(0.84~2.61) | 0.180 |
| Group 3 | 2.11(1.35~3.30) | 0.001 |  | 1.72(1.08~2.74) | 0.023 | |  | 1.69(1.05~2.74) | 0.032 |
| Group 4 | 2.82(1.49~5.36) | 0.002 |  | 2.09(1.08~4.04) | 0.028 | |  | 1.76(0.88~3.53) | 0.110 |
| P for trend | 1.44(1.22~1.70) | <0.001 |  | 1.30(1.09~1.55) | 0.003 | |  | 1.25(1.04~1.51) | 0.018 |
| **Patients with DM** | |  |  |  |  | |  |  |  |
| Group 1 | 1.00 (Reference) |  |  | 1.00 (Reference) |  | |  | 1.00 (Reference) |  |
| Group 2 | 1.34(0.93~1.94) | 0.114 |  | 1.33(0.92~1.92) | 0.130 | |  | 1.04(0.70~1.54) | 0.863 |
| Group 3 | 1.06(0.69~1.64) | 0.790 |  | 0.96(0.62~1.49) | 0.855 | |  | 0.74(0.46~1.17) | 0.196 |
| Group 4 | 1.75(1.22~2.52) | 0.002 |  | 1.73(1.20~2.50) | 0.003 | |  | 1.07(0.71~1.61) | 0.741 |
| P for trend | 1.17(1.04~1.32) | 0.009 |  | 1.15(1.02~1.30) | 0.018 | |  | 0.99(0.87~1.13) | 0.883 |

Model1：unadjusted

Model2：adjusted for age, gender, HR, RR, SBP

Model3：adjusted for Model 2 plus MI, CHF, RD, HTN, Afib, DM, Hb, BUN, Creatinine, PT, Mechanical ventilation, RI, SOFA, APSIII

Group 1: Low SHR and Low GV (SHR < 1.15 and GV < 24.46); Group 2: Low SHR and High GV (SHR < 1.15 and GV > 24.46); Group 3: High SHR and Low GV (SHR > 1.15 and GV < 24.46); Group 4: High SHR and High GV (SHR > 1.15 and GV > 24.46)

**Table A.10: The association of the combination of SHR and GV with all-cause mortality after excluding extreme value**

| **Variables** | **Model 1** | |  | **Model 2** | |  | | **Model 3** | |
| --- | --- | --- | --- | --- | --- | --- | --- | --- | --- |
| **HR (95%CI)** | **P** |  | **HR (95%CI)** | **P** | |  | **HR (95%CI)** | **P** |
| **28-day mortality** |  |  |  |  |  | |  |  |  |
| **Overall** |  |  |  |  |  | |  |  |  |
| Group 1 | 1.00 (Reference) |  |  | 1.00 (Reference) |  | |  | 1.00 (Reference) |  |
| Group 2 | 1.59(1.16~2.18) | 0.004 |  | 1.49(1.08~2.04) | 0.014 | |  | 1.07(0.76~1.51) | 0.681 |
| Group 3 | 1.61(1.24~2.10) | <0.001 |  | 1.47(1.13~1.92) | 0.004 | |  | 1.22(0.93~1.59) | 0.158 |
| Group 4 | 2.41(1.70~3.42) | <0.001 |  | 2.24(1.57~3.18) | <0.001 | |  | 1.47(0.99~2.17) | 0.056 |
| P for trend | 1.31(1.19~1.44) | <0.001 |  | 1.26(1.14~1.40) | <0.001 | |  | 1.12(1.01~1.25) | 0.035 |
| **Patients with NGR** |  |  |  |  |  | |  |  |  |
| Group 1 | 1.00 (Reference) |  |  | 1.00 (Reference) |  | |  | 1.00 (Reference) |  |
| Group 2 | 1.55(0.74~3.23) | 0.247 |  | 1.50(0.71~3.15) | 0.288 | |  | 1.13(0.50~2.58) | 0.763 |
| Group 3 | 1.59(1.07~2.37) | 0.022 |  | 1.51(1.01~2.25) | 0.045 | |  | 1.39(0.91~2.11) | 0.124 |
| Group 4 | 3.40(1.69~6.86) | 0.001 |  | 3.20(1.52~6.75) | 0.002 | |  | 2.51(1.08~5.84) | 0.033 |
| P for trend | 1.34(1.13~1.59) | 0.001 |  | 1.30(1.09~1.55) | 0.004 | |  | 1.23(1.03~1.48) | 0.026 |
| **Patients with Pre-DM** | |  |  |  |  | |  |  |  |
| Group 1 | 1.00 (Reference) |  |  | 1.00 (Reference) |  | |  | 1.00 (Reference) |  |
| Group 2 | 2.63(1.43~4.81) | 0.002 |  | 2.28(1.23~4.24) | 0.009 | |  | 1.95(1.01~3.77) | 0.046 |
| Group 3 | 2.81(1.71~4.61) | <0.001 |  | 2.58(1.55~4.30) | <0.001 | |  | 2.51(1.47~4.29) | <0.001 |
| Group 4 | 2.11(0.76~5.87) | 0.155 |  | 1.93(0.68~5.44) | 0.214 | |  | 1.95(0.67~5.69) | 0.222 |
| P for trend | 1.52(1.25~1.85) | <0.001 |  | 1.46(1.18~1.79) | <0.001 | |  | 1.45(1.16~1.81) | 0.001 |
| **Patients with DM** |  |  |  |  |  | |  |  |  |
| Group 1 | 1.00 (Reference) |  |  | 1.00 (Reference) |  | |  | 1.00 (Reference) |  |
| Group 2 | 1.05(0.67~1.65) | 0.833 |  | 1.06(0.67~1.66) | 0.817 | |  | 0.70(0.42~1.15) | 0.155 |
| Group 3 | 0.98(0.58~1.66) | 0.938 |  | 0.88(0.52~1.49) | 0.625 | |  | 0.68(0.39~1.18) | 0.169 |
| Group 4 | 1.72(1.08~2.74) | 0.023 |  | 1.67(1.05~2.68) | 0.032 | |  | 0.99(0.59~1.66) | 0.967 |
| P for trend | 1.15(0.99~1.35) | 0.068 |  | 1.13(0.97~1.32) | 0.127 | |  | 0.98(0.83~1.16) | 0.792 |
| **90-day mortality** |  |  |  |  |  | |  |  |  |
| **Overall** |  |  |  |  |  | |  |  |  |
| Group 1 | 1.00 (Reference) |  |  | 1.00 (Reference) |  | |  | 1.00 (Reference) |  |
| Group 2 | 1.77(1.37~2.30) | <0.001 |  | 1.63(1.25~2.12) | <0.001 | |  | 1.21(0.91~1.61) | 0.194 |
| Group 3 | 1.45(1.14~1.83) | 0.002 |  | 1.31(1.03~1.66) | 0.026 | |  | 1.11(0.87~1.41) | 0.411 |
| Group 4 | 2.54(1.89~3.42) | <0.001 |  | 2.29(1.69~3.09) | <0.001 | |  | 1.61(1.15~2.25) | 0.005 |
| P for trend | 1.29(1.19~1.41) | <0.001 |  | 1.24(1.14~1.35) | <0.001 | |  | 1.11(1.01~1.22) | 0.027 |
| **Patients with NGR** |  |  |  |  |  | |  |  |  |
| Group 1 | 1.00 (Reference) |  |  | 1.00 (Reference) |  | |  | 1.00 (Reference) |  |
| Group 2 | 1.93(1.08~3.47) | 0.028 |  | 1.83(1.01~3.31) | 0.047 | |  | 1.41(0.74~2.71) | 0.297 |
| Group 3 | 1.59(1.12~2.24) | 0.008 |  | 1.47(1.04~2.09) | 0.029 | |  | 1.39(0.97~1.99) | 0.077 |
| Group 4 | 2.92(1.51~5.64) | 0.001 |  | 2.67(1.34~5.32) | 0.005 | |  | 2.09(0.96~4.53) | 0.063 |
| P for trend | 1.31(1.13~1.52) | <0.001 |  | 1.26(1.08~1.47) | 0.003 | |  | 1.20(1.03~1.41) | 0.024 |
| **Patients with Pre-DM** | |  |  |  |  | |  |  |  |
| Group 1 | 1.00 (Reference) |  |  | 1.00 (Reference) |  | |  | 1.00 (Reference) |  |

**Table A.10 (continued)**

| **Variables** | **Model 1** | |  | **Model 2** | |  | | **Model 3** | |
| --- | --- | --- | --- | --- | --- | --- | --- | --- | --- |
| **HR (95%CI)** | **P** |  | **HR (95%CI)** | **P** | |  | **HR (95%CI)** | **P** |
| Group 2 | 2.47(1.48~4.12) | 0.001 |  | 1.91(1.13~3.23) | 0.016 | |  | 1.66(0.95~2.89) | 0.075 |
| Group 3 | 2.08(1.33~3.27) | 0.001 |  | 1.70(1.07~2.73) | 0.026 | |  | 1.65(1.01~2.69) | 0.046 |
| Group 4 | 2.55(1.17~5.57) | 0.019 |  | 2.17(0.98~4.77) | 0.055 | |  | 1.90(0.83~4.34) | 0.126 |
| P for trend | 1.43(1.20~1.70) | <0.001 |  | 1.31(1.09~1.58) | 0.005 | |  | 1.27(1.05~1.54) | 0.016 |
| **Patients with DM** | |  |  |  |  | |  |  |  |
| Group 1 | 1.00 (Reference) |  |  | 1.00 (Reference) |  | |  | 1.00 (Reference) |  |
| Group 2 | 1.25(0.86~1.83) | 0.243 |  | 1.26(0.86~1.86) | 0.229 | |  | 0.83(0.55~1.27) | 0.396 |
| Group 3 | 0.88(0.54~1.43) | 0.616 |  | 0.80(0.49~1.31) | 0.378 | |  | 0.64(0.39~1.06) | 0.083 |
| Group 4 | 1.97(1.32~2.94) | <0.001 |  | 1.90(1.27~2.85) | 0.002 | |  | 1.16(0.75~1.81) | 0.505 |
| P for trend | 1.18(1.04~1.35) | 0.014 |  | 1.16(1.01~1.32) | 0.033 | |  | 1.01(0.87~1.17) | 0.911 |

Model1：unadjusted

Model2：adjusted for age, gender, HR, RR, SBP

Model3：adjusted for Model 2 plus MI, CHF, RD, HTN, Afib, DM, Hb, BUN, Creatinine, PT, Mechanical ventilation, RI, SOFA, APSIII

Group 1: Low SHR and Low GV (SHR < 1.15 and GV < 24.46); Group 2: Low SHR and High GV (SHR < 1.15 and GV > 24.46); Group 3: High SHR and Low GV (SHR > 1.15 and GV < 24.46); Group 4: High SHR and High GV (SHR > 1.15 and GV > 24.46)

**Table A.11: The performance comparison of each ML model in predicting 28-day mortality**

|  | **AUC** | **Sensitivity** | **Specificity** | **Accuracy** | **F1** |
| --- | --- | --- | --- | --- | --- |
| **Overall** |  |  |  |  |  |
| LR | 0.846 | 0.974 | 0.486 | 0.568 | 0.432 |
| GBM | 0.828 | 0.475 | 0.878 | 0.807 | 0.463 |
| RF | 0.879 | 0.377 | 0.931 | 0.838 | 0.439 |
| XGBoost | 0.895 | 0.649 | 0.873 | 0.836 | 0.571 |
| LGB | 0.890 | 0.662 | 0.873 | 0.838 | 0.580 |
| **NGR** |  |  |  |  |  |
| LR | 0.922 | 0.96 | 0.720 | 0.754 | 0.528 |
| GBM | 0.821 | 0.46 | 0.884 | 0.817 | 0.448 |
| RF | 0.919 | 0.48 | 0.940 | 0.874 | 0.522 |
| XGBoost | 0.911 | 0.64 | 0.907 | 0.869 | 0.582 |
| LGB | 0.926 | 0.68 | 0.893 | 0.863 | 0.586 |
| **Pre-DM** |  |  |  |  |  |
| LR | 0.893 | 0.947 | 0.745 | 0.778 | 0.581 |
| GBM | 0.879 | 0.611 | 0.909 | 0.863 | 0.579 |
| RF | 0.846 | 0.316 | 0.969 | 0.863 | 0.429 |
| XGBoost | 0.846 | 0.579 | 0.837 | 0.795 | 0.478 |
| LGB | 0.880 | 0.421 | 0.908 | 0.829 | 0.444 |
| **DM** |  |  |  |  |  |
| LR | 0.782 | 0.943 | 0.422 | 0.534 | 0.465 |
| GBM | 0.732 | 0.371 | 0.867 | 0.761 | 0.400 |
| RF | 0.755 | 0.343 | 0.867 | 0.755 | 0.375 |
| XGBoost | 0.755 | 0.400 | 0.836 | 0.742 | 0.400 |
| LGB | 0.732 | 0.029 | 0.992 | 0.785 | 0.054 |

**Abbreviations:** LR, logistic regression; GBM, Gradient Boosting Machine; RF, Random Forest; XGBoost, Extreme Gradient Boosting; LightGBM, Light Gradient Boosting Machine.





**Fig. A.1:** The trends of the proportional - hazards assumption test based on the COX regression model.





**Fig. A.2:** Multivariable-adjusted restricted cubic spline analyses of SHR and GV for 28-day mortality. (A) SHR (B) GV





**Fig. A.3:** Forest plots for subgroup analyses of A SHR and B GV with 28-day mortality.





**Fig. A.4:** Landmark survival analysis of 28-day mortality with combined SHR and GV assessment in NGR patients. Low SHR: SHR < 1.15; High SHR: SHR > 1.15; Low GV: GV < 24.46; High GV: GV > 24.46.





**Fig. A.5:** The Boruta feature selection algorithm was employed to rank the importance of potential risk factors for 28-day mortality. The x-axis indicates the parameter names, and the y-axis represents the normalized importance score (Z-score). The box plots visualize the distribution of importance scores across all Boruta iterations. **A.** Patients with overall. **B.** Patients with normal glucose regulation (NGR). **C.** Patients with prediabetes (Pre-DM). **D.** Patients with diabetes mellitus (DM).





**Fig. A.6:** Receiver operating characteristic curve of five ML models for predicting 28-day mortality in overall patients.





**Fig. A.7:** SHAP interpretation of ML-based 28-day mortality prediction models in overall patients.
